# Supplementary material for: Raman Stable Isotope Probing of Bacteria in Visible and Deep UV-Ranges
Source: MDPI journal article supplement (doi:10.3390/life11101003), 2021-09-24
Supplement: s1 [file s1]

## Supplementary Materials Raman Stable Isotope Probing of Bacteria in Visible and Deep UV-Ranges

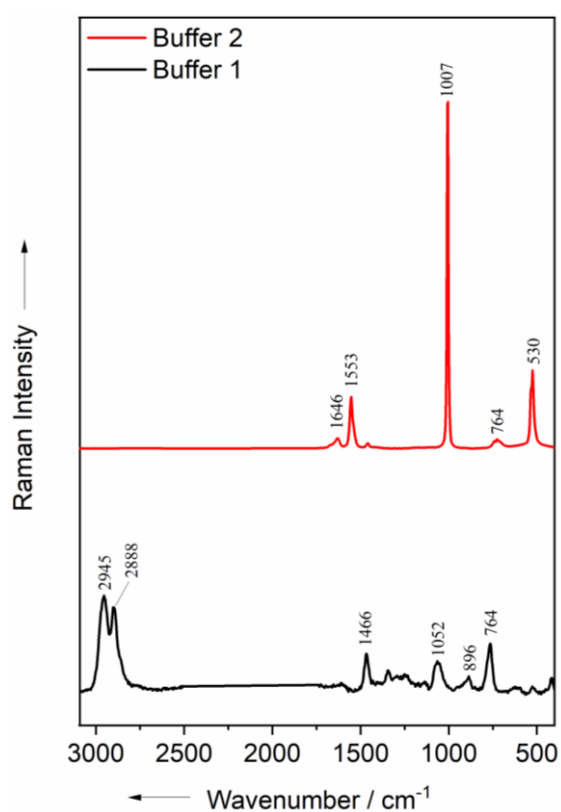

**Figure S1.** Mean Raman spectra of DNA extraction buffers.

**Table S1.** Red-shifts in the Raman bands of bacteria labeled with various isotopes. (/): new band red-shift observed in this work; no previous reference.

| 532 nm          |                                                  |                                            |                                          |                                                                                                          |                         |
|-----------------|--------------------------------------------------|--------------------------------------------|------------------------------------------|----------------------------------------------------------------------------------------------------------|-------------------------|
| Isotope         | Raman band of unlabeled cells / cm <sup>-1</sup> | Raman band of red-shift / cm <sup>-1</sup> | Extent of Raman shift / cm <sup>-1</sup> | Tentative assignement (Assignment from literature)                                                       | Reference for red-shift |
| D               | 2936                                             | 2172                                       | 764                                      | C–H stretching vibration of all biomolecules [1]                                                         | [2]                     |
| <sup>18</sup> O | 1667                                             | 1656                                       | 11                                       | C=O stretching vibration of amide I (1663 cm <sup>-1</sup> ) [1,3]                                       | [3-5]                   |
| <sup>13</sup> C |                                                  | 1628                                       | 39                                       |                                                                                                          |                         |
| <sup>15</sup> N | 1574                                             | 1565                                       | 9                                        | C=N stretching vibration of guanine and adenine (1577 cm <sup>-1</sup> ) [6]                             | [3,5]                   |
| <sup>13</sup> C | 1244                                             | 1236                                       | 8                                        | C–N stretching vibration of amide III (1241 cm <sup>-1</sup> ) [7]                                       | [3,5]                   |
| <sup>15</sup> N |                                                  | 1232                                       | 12                                       |                                                                                                          |                         |
| <sup>13</sup> C | 1007                                             | 962                                        | 39                                       | Phe ring breathing (1007 cm <sup>-1</sup> ) [3,8,9]                                                      | [3,5]                   |
| D               |                                                  | 962                                        | 39                                       |                                                                                                          |                         |
| <sup>15</sup> N | 728                                              | 713                                        | 12                                       | Ring breathing of adenine (723 cm <sup>-1</sup> ) [3]                                                    | [3,5]                   |
| D               | 479                                              | 449                                        | 30                                       | Adenine (473 cm <sup>-1</sup> )                                                                          | /                       |
| 244 nm          |                                                  |                                            |                                          |                                                                                                          |                         |
| Isotope         | Raman band of unlabeled cells / cm <sup>-1</sup> | Raman band of red-shift / cm <sup>-1</sup> | Extent of Raman shift / cm <sup>-1</sup> | Tentative assignement (Assignment from literature)                                                       | Reference for red-shift |
| <sup>13</sup> C | 1618                                             | 1564                                       | 54                                       | C=C stretching vibration of Tyr, Trp, and Phe (1609 cm <sup>-1</sup> ) [10]                              | /                       |
| <sup>13</sup> C | 1576                                             | 1563                                       | 13                                       | C=C and C=N stretching vibrations of guanine and adenine (1578 cm <sup>-1</sup> ) [10,11]                | /                       |
| <sup>15</sup> N |                                                  | 1563                                       | 13                                       |                                                                                                          |                         |
| <sup>15</sup> N | 1534                                             | 1521                                       | 13                                       | Cytosine (1533 cm <sup>-1</sup> ) [12]                                                                   | /                       |
| <sup>13</sup> C | 1485                                             | 1455                                       | 30                                       | N9C8 and C8N7 stretching vibrations along the long axis of purine bases (1485 cm <sup>-1</sup> ) [13,14] | /                       |
| <sup>15</sup> N |                                                  | 1470                                       | 15                                       |                                                                                                          |                         |
| <sup>13</sup> C | 1420                                             | 1384                                       | 36                                       | CH <sub>2</sub> -deformation vibration of Adenine (1420 cm <sup>-1</sup> ) [15,16]                       | /                       |
| <sup>15</sup> N |                                                  | 1405                                       | 15                                       |                                                                                                          |                         |
| <sup>13</sup> C | 1334                                             | 1314                                       | 20                                       | C–N stretching vibration of guanine, adenine, and tryptophan (1334 cm <sup>-1</sup> ) [11]               | /                       |
| <sup>15</sup> N |                                                  | 1311                                       | 23                                       |                                                                                                          |                         |

**Table S2.** Peaks from oligonucleotide spectrum from both excitation wavelengths. A: adenine, T: thymine, C: cytosine, G: guanine, (/): no peak appearance.

|                 | 532 nm                  |                                                |           | 244 nm                  |                                                                         |           |
|-----------------|-------------------------|------------------------------------------------|-----------|-------------------------|-------------------------------------------------------------------------|-----------|
| Oligonucleotide | Band / cm <sup>-1</sup> | Tentative assignement                          | Reference | Band / cm <sup>-1</sup> | Tentative assignement                                                   | Reference |
| Poly-A          | 473                     |                                                |           | 735                     |                                                                         |           |
|                 | 524                     | Vibration of ribose phospate                   | [15]      | 1242                    |                                                                         |           |
|                 | 611                     |                                                |           | 1257                    |                                                                         |           |
|                 | 725                     | Ring breathing vibration of adenine            | [3,5,16]  | 1311                    |                                                                         |           |
|                 | 776                     |                                                |           | 1422                    | CH <sub>2</sub> -deformation vibration                                  | [17]      |
|                 | 806                     | Ribose phosphodiester symmetric stretching     | [15]      | 1485                    | N9C8 and C8N7 stretching vibrations along the long axis of purine bases | [13,14]   |
|                 | 1022                    |                                                |           | 1581                    | NH <sub>2</sub> deformation virbration                                  | [14]      |
|                 | 1100                    | PO <sub>2</sub> -streching vibration           | [17]      | /                       | /                                                                       | /         |
|                 | 1328                    | C5N7, N7C8 stretching vibration                | [14]      | /                       | /                                                                       | /         |
|                 | 1409                    | C4N9, C8H deformation vibration                | [13]      | /                       | /                                                                       | /         |
|                 | 1508                    |                                                |           | /                       | /                                                                       | /         |
|                 | 1553                    |                                                |           | /                       | /                                                                       | /         |
|                 | 2891                    | CH <sub>2</sub> symmetric streching vibration  | [18]      | /                       | /                                                                       | /         |
|                 | 2951                    | CH <sub>2</sub> asymmetric streching vibration | [18]      | /                       | /                                                                       | /         |

|                 | 532 nm                  |                                                |           | 244 nm                  |                                                                         |           |
|-----------------|-------------------------|------------------------------------------------|-----------|-------------------------|-------------------------------------------------------------------------|-----------|
| Oligonucleotide | Band / cm <sup>-1</sup> | Tentative assignement                          | Reference | Band / cm <sup>-1</sup> | Tentative assignement                                                   | Reference |
| Poly-T          | 494                     |                                                |           | 675                     |                                                                         |           |
|                 | 563                     | Vibration of ribose phospate                   | [15]      | 771                     |                                                                         |           |
|                 | 659                     | Ribose phosphodiester symmetric stretching     | [15]      | 795                     | PO <sub>2</sub> symmetrick streching vibration                          | [17]      |
|                 | 725                     | Ring breathing vibration of adenine            | [3,5]     | 1188                    | C-C and C-N stretching vibration                                        | [14]      |
|                 | 788                     | PO <sub>2</sub> symmetric streching vibration  | [17]      | 1242                    | C6H deformation vibration, C4N4                                         | [13]      |
|                 | 839                     | O—P—O streching vibration                      | [17]      | 1377                    | C6H bending vibration, ring stretching viration                         | [14]      |
|                 | 1016                    | Vibration of ribose                            | [15]      | 1485                    | N9C8 and C8N7 stretching vibrations along the long axis of purine bases | [13,14]   |
|                 | 1091                    | PO <sub>2</sub> -streching vibration           | [17]      | 1656                    | C4=O-C4C5 streching vibration                                           | [13,14]   |
|                 | 1184                    | C-C and C-N stretching vibration               | [14]      | /                       | /                                                                       | /         |
|                 | 1235                    |                                                |           | /                       | /                                                                       | /         |
|                 | 1373                    | C6H bending vibration                          | [14]      | /                       | /                                                                       | /         |
|                 | 1430                    | CH <sub>2</sub> -deformation vibration         | [17]      | /                       | /                                                                       | /         |
|                 | 1667                    | C=O stretchichng vibration                     | [16]      | /                       | /                                                                       | /         |
|                 | 2954                    | CH <sub>2</sub> asymmetric streching vibration | [18]      | /                       | /                                                                       | /         |

|                 | 532 nm                  |                                                                         |           | 244 nm                  |                                                                         |           |
|-----------------|-------------------------|-------------------------------------------------------------------------|-----------|-------------------------|-------------------------------------------------------------------------|-----------|
| Oligonucleotide | Band / cm <sup>-1</sup> | Tentative assignement                                                   | Reference | Band / cm <sup>-1</sup> | Tentative assignement                                                   | Reference |
| Poly-C          | 533                     |                                                                         |           | 795                     | PO <sub>2</sub> -stretching vibration                                   | [17]      |
|                 | 572                     |                                                                         |           | 1296                    |                                                                         |           |
|                 | 725                     | Ring breathing vibration of adenine                                     | [3,5]     | 1485                    | N9C8 and C8N7 stretching vibrations along the long axis of purine bases | [13,14]   |
|                 | 785                     | PO <sub>2</sub> symmetric streching vibration, Ring breathing vibration | [13,16]   | 1527                    |                                                                         |           |
|                 | 836                     | O—P—O streching vibration                                               | [17]      | 1647                    | C2=O stretching vibration                                               | [13]      |
|                 | 965                     |                                                                         | [17]      | /                       | /                                                                       | /         |
|                 | 1010                    | Vibration of ribose phospate                                            | [15]      | /                       | /                                                                       | /         |
|                 | 1097                    | PO <sub>2</sub> -stretching vibration                                   | [13]      | /                       | /                                                                       | /         |
|                 | 1259                    | C6H deformation vibration, C4N4                                         | [17]      | /                       | /                                                                       | /         |
|                 | 1388                    | C4N, N2C2 stretching vibration                                          | [13]      | /                       | /                                                                       | /         |
|                 | 1430                    | CH <sub>2</sub> -deformation viration                                   | [14]      | /                       | /                                                                       | /         |
|                 | 1541                    | N3=C4 vibration                                                         | [17]      | /                       | /                                                                       | /         |
|                 | 1667                    | C=O stretching                                                          | [13]      | /                       | /                                                                       | /         |
|                 | 2894                    | CH <sub>2</sub> symmetric streching vibration                           | [18]      | /                       | /                                                                       | /         |
|                 | 2954                    | CH <sub>2</sub> asymmetric streching vibration                          | [18]      | /                       | /                                                                       | /         |

|                 | 532 nm                  |                                                                         |           |                         | 244 nm                                                                  |           |  |
|-----------------|-------------------------|-------------------------------------------------------------------------|-----------|-------------------------|-------------------------------------------------------------------------|-----------|--|
| Oligonucleotide | Band / cm <sup>-1</sup> | Tentative assignement                                                   | Reference | Band / cm <sup>-1</sup> | Tentative assignement                                                   | Reference |  |
| Poly-G          | 497                     | Vibration of ribose phosphate                                           | [15]      | 1328                    | C–N stretching vibration                                                | [11,13]   |  |
|                 | 581                     | Vibration of ribose phosphate                                           | [15]      | 1362                    | N7C8, N1C6, N5N7 stretching vibration                                   | [14]      |  |
|                 | 686                     | Ring breathing vibration                                                | [16]      | 1485                    | N9C8 and C8N7 stretching vibrations along the long axis of purine bases | [13,14]   |  |
|                 | 725                     | Ring breathing vibration of adenine                                     | [3,5]     | 1578                    | NH <sub>2</sub> deformation vibration                                   | [14]      |  |
|                 | 785                     | PO <sub>2</sub> -streching vibration                                    | [13,16]   | /                       | /                                                                       | /         |  |
|                 | 839                     | O–P–O stretching vibration                                              | [16]      | /                       | /                                                                       | /         |  |
|                 | 1016                    | Vibration of ribose                                                     |           | /                       | /                                                                       | /         |  |
|                 | 1094                    | PO <sub>2</sub> -streching vibration                                    | [17]      | /                       | /                                                                       | /         |  |
|                 | 1175                    | C-C and C-N streching vibration                                         | [15]      | /                       | /                                                                       | /         |  |
|                 | 1328                    | C5N7, N7C8 stretching vibration                                         | [14]      | /                       | /                                                                       | /         |  |
|                 | 1361                    | N7C8, N1C6, N5N7 stretching vibration                                   | [14]      | /                       | /                                                                       | /         |  |
|                 | 1430                    | CH <sub>2</sub> -deformation vibration                                  | [17]      | /                       | /                                                                       | /         |  |
|                 | 1478                    | N9C8 and C8N7 stretching vibrations along the long axis of purine bases | [13,14]   | /                       | /                                                                       | /         |  |

|                                     | 532 nm |                                                 |      | 244 nm |   |   |
|-------------------------------------|--------|-------------------------------------------------|------|--------|---|---|
| <b>Poly-G</b><br><b>(continued)</b> | 1577   | NH <sub>2</sub> deformation vibration           | [14] | /      | / | / |
|                                     | 1712   | C6=O stretch                                    | [13] |        | / |   |
|                                     | 2894   | CH <sub>2</sub> symmetric stretching vibration  | [18] | /      |   | / |
|                                     | 2954   | CH <sub>2</sub> asymmetric stretching vibration | [18] | /      | / | / |

**Table S3.** Peaks from oligonucleotide spectrum that appear at both excitation wavelengths. A: adenine, T: thymine, C: cytosine, G: guanine, (/): no peak appearance.

| A                    |                      | T                     |                       | C                     |                       | G                     |                       |
|----------------------|----------------------|-----------------------|-----------------------|-----------------------|-----------------------|-----------------------|-----------------------|
| 532 nm               | 244 nm               | 532 nm                | 244 nm                | 532 nm                | 244 nm                | 532 nm                | 244 nm                |
| 725 cm <sup>-1</sup> | 735 cm <sup>-1</sup> | 1184 cm <sup>-1</sup> | 1188 cm <sup>-1</sup> | 785 cm <sup>-1</sup>  | 795 cm <sup>-1</sup>  | 1328 cm <sup>-1</sup> | 1326 cm <sup>-1</sup> |
| /                    | /                    | 1235 cm <sup>-1</sup> | 1242 cm <sup>-1</sup> | 1667 cm <sup>-1</sup> | 1647 cm <sup>-1</sup> | 1361 cm <sup>-1</sup> | 1362 cm <sup>-1</sup> |
| /                    | /                    | 1667 cm <sup>-1</sup> | 1656 cm <sup>-1</sup> | /                     | /                     | 1478 cm <sup>-1</sup> | 1485 cm <sup>-1</sup> |
| /                    | /                    | /                     | /                     | /                     | /                     | 1577 cm <sup>-1</sup> | 1578 cm <sup>-1</sup> |



**Table S4** Red-shifts in the UV Raman bands of DNA isolated from bacteria incubated with isotopes.

| Isotope         | Raman band of unlabeled cells / $\text{cm}^{-1}$ | Raman band of red-shift / $\text{cm}^{-1}$ | Extent of Raman shift / $\text{cm}^{-1}$ | Assignment                                                              |
|-----------------|--------------------------------------------------|--------------------------------------------|------------------------------------------|-------------------------------------------------------------------------|
| $^{13}\text{C}$ | 1334                                             | <b>1314</b>                                | 20                                       | C–N stretching vibration of guanine, adenine, and tryptophan            |
| $^{15}\text{N}$ |                                                  | <b>1311</b>                                | 23                                       |                                                                         |
| $^{13}\text{C}$ | 1485                                             | <b>1455</b>                                | 30                                       | N9C8 and C8N7 stretching vibrations along the long axis of purine bases |
| $^{15}\text{N}$ |                                                  | <b>1470</b>                                | 15                                       |                                                                         |

## References

1. Harz, M.; Rösch, P.; Popp, J. Vibrational spectroscopy – A powerful tool for the rapid identification of microbial cells at the single-cell level. *Cytometry A* **2009**, *75A*, 104-113, doi:doi:10.1002/cyto.a.20682.
2. Tao, Y.; Wang, Y.; Huang, S.; Zhu, P.; Huang, W.E.; Ling, J.; Xu, J. Metabolic-Activity-Based Assessment of Antimicrobial Effects by D2O-Labeled Single-Cell Raman Microspectroscopy. *Anal. Chem.* **2017**, *89*, 4108-4115, doi:10.1021/acs.analchem.6b05051.
3. Huang, W.E.; Li, M.; Jarvis, R.M.; Goodacre, R.; Banwart, S.A. Chapter 5 - Shining Light on the Microbial World: The Application of Raman Microspectroscopy. In *Advances in Applied Microbiology*, Vol 70, Laskin, A.I., Sariaslani, S., Gadd, G.M., Eds.; Advances in Applied Microbiology; Academic Press: 2010; Volume 70, pp. 153-186.
4. Azemtsop Matanfack, G.; Pistiki, A.; Rösch, P.; Popp, J. Raman 18O-labeling of bacteria in visible and deep UV-ranges. *Journal of Biophotonics* **2021**, *14*, e202100013, doi:10.1002/jbio.202100013.
5. Wang, Y.; Huang, W.E.; Cui, L.; Wagner, M. Single cell stable isotope probing in microbiology using Raman microspectroscopy. *Curr. Opin. Biotechnol.* **2016**, *41*, 34-42, doi:10.1016/j.copbio.2016.04.018.
6. Žukovskaja, O.; Kloß, S.; Blango, M.G.; Ryabchikov, O.; Kniemeyer, O.; Brakhage, A.A.; Bocklitz, T.W.; Cialla-May, D.; Weber, K.; Popp, J. UV-Raman Spectroscopic Identification of Fungal Spores Important for Respiratory Diseases. *Anal. Chem.* **2018**, *90*, 8912-8918, doi:10.1021/acs.analchem.8b01038.
7. Kloß, S.; Kampe, B.; Sachse, S.; Rösch, P.; Straube, E.; Pfister, W.; Kiehntopf, M.; Popp, J. Culture Independent Raman Spectroscopic Identification of Urinary Tract Infection Pathogens: A Proof of Principle Study. *Anal. Chem.* **2013**, *85*, 9610-9616, doi:10.1021/ac401806f.
8. Wang, Y.; Song, Y.; Tao, Y.; Muhamadali, H.; Goodacre, R.; Zhou, N.Y.; Preston, G.M.; Xu, J.; Huang, W.E. Reverse and Multiple Stable Isotope Probing to Study Bacterial Metabolism and Interactions at the Single Cell Level. *Anal. Chem.* **2016**, *88*, 9443-9450, doi:10.1021/acs.analchem.6b01602.
9. Kirchhoff, J.; Glaser, U.; Bohnert, J.A.; Pletz, M.W.; Popp, J.; Neugebauer, U. Simple Ciprofloxacin Resistance Test and Determination of Minimal Inhibitory Concentration within 2 h Using Raman Spectroscopy. *Anal. Chem.* **2018**, *90*, 1811-1818, doi:10.1021/acs.analchem.7b03800.
10. Walter, A.; Reinicke, M.; Bocklitz, T.; Schumacher, W.; Rösch, P.; Kothe, E.; Popp, J. Raman spectroscopic detection of physiology changes in plasmid-bearing *Escherichia coli* with and without antibiotic treatment. *Anal. Bioanal. Chem.* **2011**, *400*, 2763-2773, doi:10.1007/s00216-011-4819-4.
11. Silge, A.; Heinke, R.; Bocklitz, T.; Wiegand, C.; Hipler, U.-C.; Rösch, P.; Popp, J. The application of UV resonance Raman spectroscopy for the differentiation of clinically relevant *Candida* species. *Anal. Bioanal. Chem.* **2018**, *410*, 5839-5847, doi:10.1007/s00216-018-1196-2.
12. Walter, A.; Schumacher, W.; Bocklitz, T.; Reinicke, M.; Rösch, P.; Kothe, E.; Popp, J. From Bulk to Single-Cell Classification of the Filamentous Growing *Streptomyces* Bacteria by Means of Raman Spectroscopy. *Appl. Spectrosc.* **2011**, *65*, 1116-1125, doi:10.1366/11-06329.
13. Neugebauer, U.; Schmid, U.; Baumann, K.; Simon, H.; Schmitt, M.; Popp, J. DNA tertiary structure and changes in DNA supercoiling upon interaction with ethidium bromide and gyrase monitored by UV resonance Raman spectroscopy. *J. Raman Spectrosc.* **2007**, *38*, 1246-1258, doi:10.1002/jrs.1760.
14. Harz, M.; Krause, M.; Bartels, T.; Cramer, K.; Rösch, P.; Popp, J. Minimal Invasive Gender Determination of Birds by Means of UV-Resonance Raman Spectroscopy. *Analytical Chemistry* **2008**, *80*, 1080-1086, doi:10.1021/ac702043q.
15. Tu, A. *Raman Spectroscopy in biology*; Wiley-International: USA, 1982.

16. Benevides, J.M.; Overman, S.A.; Thomas Jr, G.J. Raman, polarized Raman and ultraviolet resonance Raman spectroscopy of nucleic acids and their complexes. *J. Raman Spectrosc.* **2005**, *36*, 279-299, doi:10.1002/jrs.1324.
17. Neugebauer, U.; Clement, J.H.; Bocklitz, T.; Krafft, C.; Popp, J. Identification and differentiation of single cells from peripheral blood by Raman spectroscopic imaging. *Journal of Biophotonics* **2010**, *3*, 579-587, doi:10.1002/jbio.201000020.
18. Azemtsova Matanfack, G.; Taubert, M.; Guo, S.; Bocklitz, T.; Küsel, K.; Rösch, P.; Popp, J. Monitoring Deuterium Uptake in Single Bacterial Cells via Two-Dimensional Raman Correlation Spectroscopy. *Anal. Chem.* **2021**, *93*, 7714-7723, doi:10.1021/acs.analchem.1c01076.
